# Supplementary material for: Water reduction on the facets of Fe(OH)2: an experimental and DFT study
Source: Royal Society of Chemistry journal article supplement (doi:10.1039/d2en00629d), 2022-01-01
Supplement: d2en00629d1.pdf [file d2en00629d1.pdf]

## Supplementary Information

### Water reduction on the facets of Fe(OH)<sub>2</sub>: an experimental and DFT study

Han Song,<sup>‡a</sup> Xinwen Ou,<sup>‡a</sup> Mengye Wang,<sup>b</sup> Yan Zhang,<sup>c</sup> Zhang Lin<sup>\*a, d, e</sup>

<sup>a.</sup> School of Environment and Energy, Guangdong Provincial Key Laboratory of Solid Wastes Pollution Control and Recycling, South China University of Technology, Guangzhou, Guangdong 510006, China

<sup>b.</sup> State Key Laboratory of Optoelectronic Materials and Technologies, School of Materials, Sun Yat-Sen University, Guangzhou, 510275 China

<sup>c.</sup> State Key Laboratory of Structural Chemistry, Fujian Institute of Research on the Structure of Matter, Chinese Academy of Sciences, Fuzhou, Fujian 350002, China

<sup>d.</sup> School of Metallurgy and Environment, Central South University, Changsha, 410083, China.

<sup>e.</sup> Chinese National Engineering Research Center for Control & Treatment of Heavy Metal Pollution, Changsha, 410083, China.

#### **This PDF file includes:**

Figures S1 to S5 and Table S1 to S2

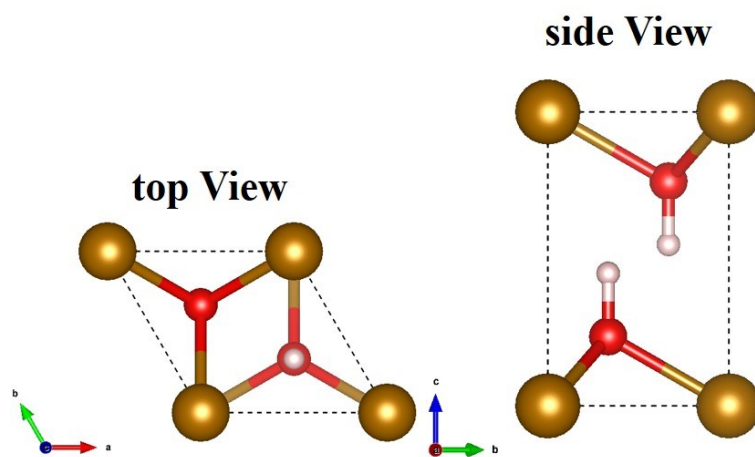

**Fig. S1.** DFT-optimized crystal structure of Fe(OH)<sub>2</sub>; Fe = orange spheres, O= red spheres and H = white spheres.

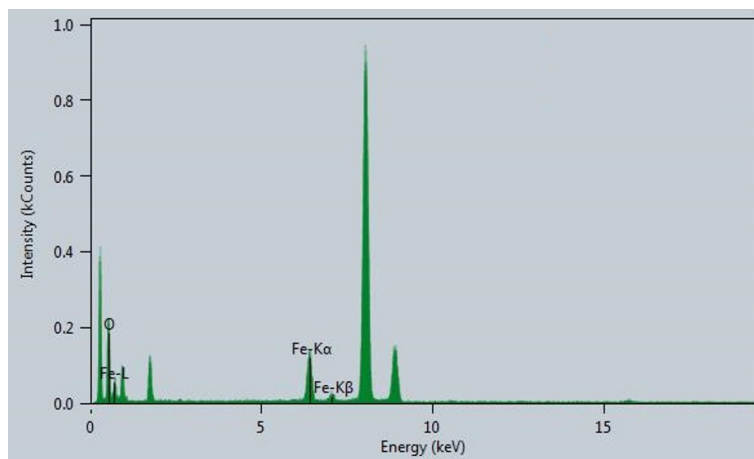

**Fig. S2.** The elemental spectroscopy of as-prepared Fe(OH)<sub>2</sub>.

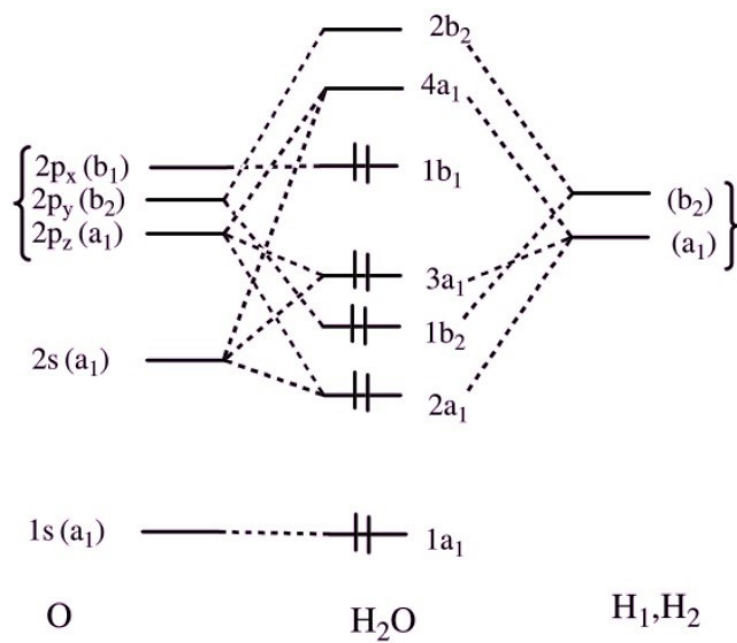

**Fig. S3.** The schematic diagram for molecular orbitals of free water molecule.

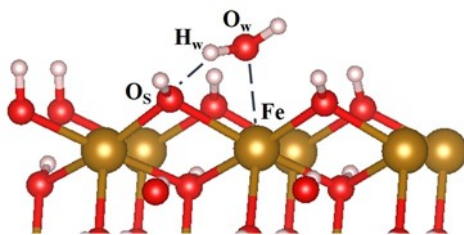

**Fig. S4.** The DFT-optimized atomic configurations of two atom pairs for COHP and ICOHP calculation, when H<sub>2</sub>O was adsorbed on (100) facet of Fe(OH)<sub>2</sub>.

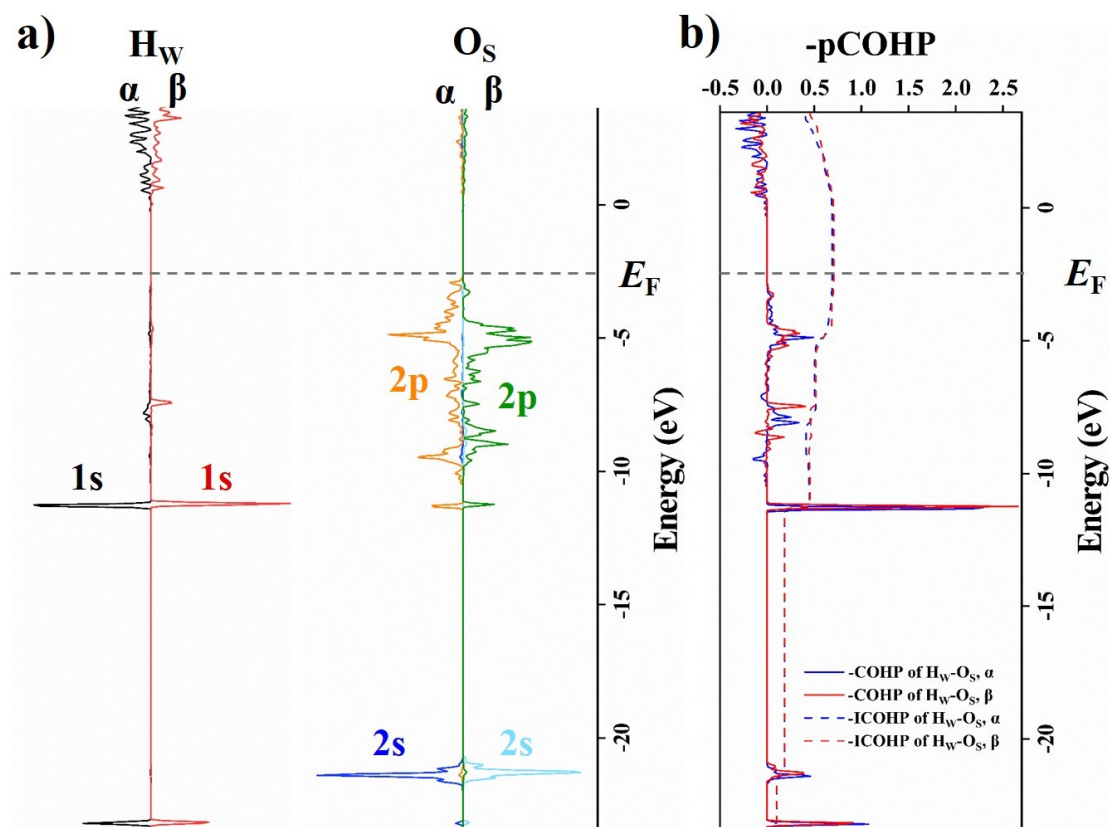

**Fig. S5.** Projected electronic densities of states (pDOS) of 1s orbital of H<sub>W</sub>, 2s and 2p orbitals of O<sub>S</sub> on Fe(OH)<sub>2</sub>(100) facet after H<sub>2</sub>O adsorption. b) The crystal orbital hamilton population (COHP) and integrated COHP (ICOHP) density between H<sub>W</sub> and O<sub>S</sub>. α = spin up and β = spin down.

**Table S1.** The comparison of H<sub>2</sub>O morphology before and after adsorbed on different facets of Fe(OH)<sub>2</sub>.

| Facet               | (100) | (101) | (102) | Free water molecule |
|---------------------|-------|-------|-------|---------------------|
| Angle/°             | 105.7 | 104.9 | 105.4 | 104.5               |
| O-H <sub>1</sub> /Å | 1.015 | 0.994 | 0.976 | 0.973               |
| O-H <sub>2</sub> /Å | 0.973 | 0.975 | 0.974 | 0.973               |

**Table S2.** The Bader charge of free H<sub>2</sub>O molecule and after adsorbed on different surfaces of Fe(OH)<sub>2</sub>.

| Sample                         | Bader charge (electrons) |                |      |       |
|--------------------------------|--------------------------|----------------|------|-------|
|                                | H <sub>1</sub>           | H <sub>2</sub> | O    | Total |
| (100)                          | 0.33                     | 0.26           | 7.43 | 8.02  |
| (101)                          | 0.33                     | 0.32           | 7.34 | 7.99  |
| (102)                          | 0.34                     | 0.36           | 7.28 | 7.98  |
| Free H <sub>2</sub> O molecule | 0.33                     | 0.31           | 7.36 | 8.00  |
